# Supplementary material for: A visualizable and widely applicable steric repulsion descriptor for guiding experimental chemistry
Source: Royal Society of Chemistry journal article supplement (doi:10.1039/d5sc07952g), 2026-01-01
Supplement: d5sc07952g2.pdf [file d5sc07952g2.pdf]

## Electronic Supplementary Information (ESI)

Click here to access the video:

[http://igmpplot.univ-reims.fr/videos/34\\_RobiettemovieSELF\\_3x.mp4](http://igmpplot.univ-reims.fr/videos/34_RobiettemovieSELF_3x.mp4)

illustrating steric dynamics across hindered rotation:

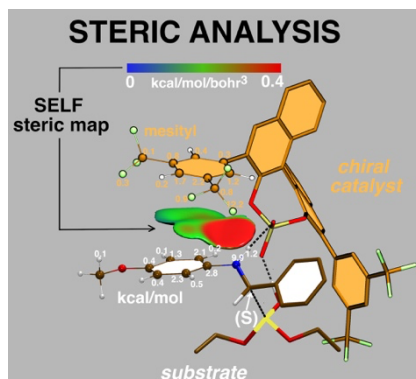

For a more comprehensive appreciation of the steric repulsion intricacies, we invite readers to explore the animated evolution of SELF iso-surface during rotation (presented in the ESI). This visualization provides a compelling and intuitive view of the subtle steric dynamics that occur over the course of the rotation.
